# Supplementary material
Source: MDPI journal article supplement (https://www.mdpi.com/2073-4395/13/7/1887)
Supplement: s1 [file s1]

**Table S1.** Effects of different tillage practices and fertilization managements on the annual economic input, income and benefit of rice production over the four-year experimental period.

| Treatment | Rice production input (CNY ha <sup>-1</sup> year <sup>-1</sup> ) |         |            |                |       | Rice production income (CNY ha <sup>-1</sup> year <sup>-1</sup> ) | Economic benefit (CNY ha <sup>-1</sup> year <sup>-1</sup> ) |
|-----------|------------------------------------------------------------------|---------|------------|----------------|-------|-------------------------------------------------------------------|-------------------------------------------------------------|
|           | biochar                                                          | tillage | fertilizer | activity costs | total |                                                                   |                                                             |
| RT-CK     | /                                                                | 4200    | /          | 9150           | 13350 | 21870±634c                                                        | 8520±634d                                                   |
| RT-FS     | /                                                                | 4200    | 2595       | 9150           | 15945 | 31234±397b                                                        | 15289±397b                                                  |
| RT-FB     | 7020                                                             | 4200    | 2595       | 9150           | 22965 | 34102±682a                                                        | 11137±682c                                                  |
| RT-F      | /                                                                | 4200    | 2595       | 9150           | 15945 | 31349±867b                                                        | 15404±867b                                                  |
| NT-CK     | /                                                                | /       | /          | 9150           | 9150  | 18026±536d                                                        | 8876±536d                                                   |
| NT-FS     | /                                                                | /       | 2595       | 9150           | 11745 | 30271±853b                                                        | 18526±853a                                                  |
| NT-FB     | 7020                                                             | /       | 2595       | 9150           | 18765 | 31598±128b                                                        | 12833±128c                                                  |
| NT-F      | /                                                                | /       | 2595       | 9150           | 11745 | 29475±809b                                                        | 17730±809a                                                  |

Mean ± SE; different letters indicate significant difference at  $P < 0.05$ . The activity costs consisted of seedling production (250 and 200 CNY ha<sup>-1</sup> year<sup>-1</sup> respectively for early rice and late rice), pesticides (1500 and 1200 CNY ha<sup>-1</sup> year<sup>-1</sup> respectively for early rice and late rice), mechanical harvesting (2100 CNY ha<sup>-1</sup> year<sup>-1</sup> for both early rice and late rice), irrigation and field managements (450 CNY ha<sup>-1</sup> year<sup>-1</sup> for both early rice and late rice).

**Table S2.** The annual economic benefit of biochar application compared to local farmer's production over the four-year experimental period.

| Treatment | Direct benefit (CNY ha <sup>-1</sup> ) | Carbon compensation (CNY ha <sup>-1</sup> ) | Total benefit (CNY ha <sup>-1</sup> ) |
|-----------|----------------------------------------|---------------------------------------------|---------------------------------------|
| RT-CK     | -6769                                  | 928                                         | -5841                                 |
| RT-FS     | 0                                      | 0                                           | 0                                     |
| RT-FB*    | 2868                                   | 1379                                        | 4247                                  |
| RT-F      | 115                                    | 1267                                        | 1382                                  |
| NT-CK     | -6413                                  | 1536                                        | -4877                                 |
| NT-FS     | 3237                                   | 517                                         | 3754                                  |
| NT-FB*    | 4564                                   | 1401                                        | 5965                                  |
| NT-F      | 2441                                   | 1396                                        | 3837                                  |

RT-FS treatment was the same to local farmer's production. The asterisk (\*) indicated that the biochar input was not considered in the direct benefit calculation process for RT-FB and NT-FB with the value of 28080 CNY ha<sup>-1</sup>. The carbon compensation was computed on the basis of carbon-trade price (59.31 CNY t<sup>-1</sup> CO<sub>2</sub>-eq) on 10.07.2023 in China (Tianjin Climate Exchange, <https://www.chinatcx.com.cn/>) and the mitigated GWPs compared to RT-FS.
